# Supplementary material for: Moxetumomab pasudotox in relapsed/refractory hairy cell leukemia
Source: Springer Nature journal article supplement (doi:10.1038/s41375-018-0210-1), 2018-07-20

## **Supplementary Appendix**

### **Summary**

This supplementary appendix includes additional detail regarding minimal residual disease assessments, patient disposition and per-patient results, results of subgroup analyses of efficacy, and additional safety, pharmacokinetic, pharmacodynamic, and immunogenicity data.

### **Supplementary Methods**

#### ***Minimal Residual Disease Assessment***

Bone marrow biopsy slides were stained by hemoxylin and eosin and by immunohistochemistry at local study sites and provided to the blinded independent central review vendor. A blinded pathologist evaluated stained slides using an Olympus BX43 microscope with 5 objectives (4x, 10x, 20x, 40x, and oil 100x). The pathologist first reviewed hemoxylin and eosin stained bone marrow biopsy slides; at least 200 cells were counted. In the absence of hairy cells in the hemoxylin and eosin stain, IHC stains were reviewed. CD20 was used primarily to determine presence and percentage of hairy cell involvement; interstitial infiltrative patterns or clusters were used to differentiate hairy cells from normal B cells. Annexin A1 and DBA.44 were used to confirm hairy cells in CD20+ clusters for low-level involvement. CD79a and PAX-5 were supplementary to confirm B cell infiltrates. Samples with no (0%) involvement were qualified as minimal residual disease negative and any involvement was considered minimal residual disease positive.

## **Supplementary Results**

### ***Subgroup Analysis of Efficacy***

Results of subgroup analyses of blinded independent central review-assessed durable complete response rate, complete response rate, and objective response rate by baseline demographic characteristics and prior HCL therapies showed no apparent differences among subgroups except that patients at least 65 years of age had a significantly lower durable complete response rate (2/31) than the younger subgroup (22/49). This difference can be at least partly explained by the fact that among the eight elderly patients who had complete responses, four were late-confirmed complete responses. These patients, therefore, have the potential to achieve the criteria for durable complete response post data cutoff date.

### ***Hemolytic Uremia Syndrome/Capillary Leak Syndrome***

Ten patients experienced HUS and/or CLS. Seven patients (8.8%) had CLS (grade 2, n=5; grade 4: n=2), 7 patients (8.8%) had HUS (grade 2: n=2; grade 3: n=3; grade 4: n=2) including 1 patient who was adjudicated by the sponsor as having experienced a grade 3 HUS-like event (meeting all criteria for grade 3 HUS except for the requirement of at least 5 schistocytes/high power field), and 4 patients (5.0%) had both.

### ***Pharmacokinetics***

After subsequent doses, on study days 8 and 29 CD19+ B cells were almost fully depleted and a weakened relationship with PK was observed, whereas the relationship was still maintained at the highest B-cell counts. Taken together, these data suggest

that inter-individual variability in PK can be explained at least in part by the differences in baseline CD19+ B cell counts and the magnitude of B-cell depletion posttreatment.

### ***Effect of Immunogenicity on Pharmacokinetics***

The potential effect of pre-existing antibodies on PK exposure was evaluated by comparing PK data based on the antidrug antibody status at baseline. With consideration of the observed inter-patient variability in exposure, AUC and  $C_{\max}$  analyses showed that moxetumomab pasudotox PK during Cycle 1 was similar regardless of antidrug antibody status at baseline. However, the presence of postbaseline antidrug antibodies was associated with statistically significant ( $t$  test,  $p < 0.05$ ) changes in peak exposure in cycle 3 and beyond, consistent with increasing titer levels. The patients who tested ADA-positive with high titers ( $>10\ 000$ ) had reduced PK exposure compared to ADA-negative patients (**Figure S3**). Taken together, these data indicate that the observed impact of ADA on PK was due to titer level and not directly related to time.

**Table S1. Demographic features, prior therapies, and response to moxetumomab pasudotox**

| Demographics |     |     | Prior Lines — No. |     |           | Baseline Disease Characteristics |            |          |            |            |             | Disease Response |         |            |            |
|--------------|-----|-----|-------------------|-----|-----------|----------------------------------|------------|----------|------------|------------|-------------|------------------|---------|------------|------------|
| Pt.          | Age | Sex | Total             | PNA | Rituximab | HCL Type                         | Hgb (g/dL) | ANC (nL) | Plat. (nL) | BM H&E (%) | Spleen (mm) | BICR BOR         | INV BOR | Durable CR | CR Ongoing |
| 1            | 48  | M   | 3                 | 3   | 0         | Classical                        | 12.9       | 1.0      | 57         | 30         | 140         | CR               | CR      | Y          | Y          |
| 2            | 59  | M   | 5                 | 5   | 0         | Classical                        | 12.4       | 0.5      | 35         | 85         | 152         | CR               | CR      | Y          | Y          |
| 3            | 73  | M   | 3                 | 1   | 2         | Classical                        | 12.0       | 0.1      | 100        | 97         | 129         | NE               | NE      |            |            |
| 4            | 54  | M   | 3                 | 2   | 1         | Classical                        | 13.1       | 0.8      | 64         | 75         | 137         | CR               | CR      | Y          | Y          |
| 5            | 50  | M   | 2                 | 2   | 0         | Classical                        | 15.3       | 1.8      | 89         | 70         | 115         | CR               | CR      | Y          | Y          |
| 6            | 44  | M   | 2                 | 2   | 2         | Classical                        | 10.1       | 0.7      | 101        | 20         | 98          | PR               | CR      |            |            |
| 7            | 47  | M   | 3                 | 2   | 1         | Classical                        | 10.5       | 0.7      | 109        | 75         | NE          | CR               | CR      | Y          | Y          |
| 8            | 64  | M   | 4                 | 3   | 1         | Classical                        | 10.7       | 0.8      | 140        | 70         | 109         | CR               | CR      | Y          | N          |
| 9            | 67  | M   | 2                 | 2   | 0         | Classical                        | 7.4        | 0.1      | 15         | 95         | 107         | SD               | NE      |            |            |
| 10           | 43  | F   | 2                 | 1   | 1         | Classical                        | 11.8       | 0.5      | 75         | 90         | 110         | PR               | CR      |            |            |
| 11           | 34  | F   | 4                 | 3   | 1         | Classical                        | 9.0        | 0.2      | 26         | 80         | 126         | PR               | PR      |            |            |
| 12           | 52  | M   | 4                 | 3   | 2         | Classical                        | 13.4       | 0.6      | 68         | 20         | 118         | CR               | CR      | Y          | Y          |
| 13           | 56  | M   | 3                 | 2   | 2         | Classical                        | 8.9        | 0.5      | 80         | NA         | 121         | PR               | PR      |            |            |
| 14           | 75  | M   | 3                 | 2   | 1         | Classical                        | 10.7       | 2.4      | 60         | 97         | 161         | PR               | PR      |            |            |
| 15           | 71  | M   | 4                 | 3   | 1         | Classical                        | 10.4       | 0.3      | 58         | 85         | 92          | SD               | SD      |            |            |
| 16           | 77  | M   | 4                 | 3   | 0         | Classical                        | 12.0       | 4.3      | 15         | 75         | 209         | SD               | PD      |            |            |
| 17           | 52  | M   | 3                 | 3   | 1         | Classical                        | 12.7       | 0.8      | 71         | 40         | 179         | CR               | CR      | Y          | N          |
| 18           | 63  | M   | 4                 | 2   | 1         | Classical                        | 10.5       | 1.1      | 119        | 90         | 122         | CR               | CR      | Y          | Y          |
| 19           | 49  | M   | 3                 | 2   | 1         | Classical                        | 12.2       | 0.7      | 55         | 95         | 170         | CR               | CR      | Y          | Y          |
| 20           | 49  | M   | 2                 | 2   | 0         | Classical                        | 10.0       | 0.8      | 86         | 90         | 106         | PR               | PR      |            |            |
| 21           | 60  | M   | 2                 | 2   | 1         | Classical                        | 11.4       | 1.0      | 71         | 99         | 128         | CR               | CR      | Y          | N          |
| 22           | 41  | F   | 2                 | 2   | 0         | Classical                        | 9.9        | 0.9      | 76         | 20         | 130         | CR               | CR      | Y          | Y          |
| 23           | 58  | M   | 7                 | 3   | 4         | Classical                        | 11.7       | 1.0      | 91         | 85         | 97          | CR               | CR      | Y          | Y          |
| 24           | 54  | M   | 4                 | 3   | 1         | Classical                        | 14.1       | 3.7      | 73         | 80         | 121         | CR               | CR      | Y          | Y          |
| 25           | 43  | F   | 2                 | 2   | 1         | Classical                        | 9.7        | 0.4      | 88         | 98         | 100         | PR               | PR      |            |            |
| 26           | 41  | F   | 4                 | 2   | 1         | Classical                        | 11.6       | 0.5      | 109        | 96         | 133         | CR               | CR      | N          | Y          |
| 27           | 60  | M   | 6                 | 4   | 1         | Classical                        | 11.9       | 0.6      | 105        | 80         | 148         | CR               | CR      | Y          | Y          |

| Demographics |     |     | Prior Lines — No. |     |           | Baseline Disease Characteristics |            |          |            |            |             | Disease Response |         |            |            |
|--------------|-----|-----|-------------------|-----|-----------|----------------------------------|------------|----------|------------|------------|-------------|------------------|---------|------------|------------|
| Pt.          | Age | Sex | Total             | PNA | Rituximab | HCL Type                         | Hgb (g/dL) | ANC (nL) | Plat. (nL) | BM H&E (%) | Spleen (mm) | BICR BOR         | INV BOR | Durable CR | CR Ongoing |
| 28           | 52  | M   | 3                 | 3   | 0         | Classical                        | 10.9       | 0.9      | 107        | NE         | 150         | CR               | PR      | N          | Y          |
| 29           | 72  | M   | 6                 | 3   | 2         | Classical                        | 13.0       | 1.6      | 48         | 12         | 103         | PR               | PR      |            |            |
| 30           | 62  | M   | 4                 | 2   | 2         | Classical                        | 13.6       | 0.9      | 50         | 80         | 157         | CR               | CR      | Y          | Y          |
| 31           | 53  | M   | 2                 | 1   | 0         | Classical                        | 12.3       | 0.8      | 84         | 15         | 162         | CR               | CR      | Y          | Y          |
| 32           | 71  | M   | 2                 | 2   | 0         | Classical                        | 9.6        | 1.2      | 75         | 100        | 103         | CR               | PR      | N          | N          |
| 33           | 68  | F   | 6                 | 5   | 2         | Classical                        | 7.4        | 0.4      | 13         | 99         | 176         | SD               | PD      |            |            |
| 34           | 64  | F   | 6                 | 4   | 1         | Classical                        | 12.1       | 0.8      | 100        | 80         | 134         | PR               | CR      |            |            |
| 35           | 36  | F   | 3                 | 2   | 1         | Classical                        | 7.9        | 0.3      | 90         | 98         | 91          | PR               | PR      |            |            |
| 36           | 65  | M   | 3                 | 3   | 0         | Classical                        | 10.8       | 2.5      | 40         | NA         | 187         | CR               | CR      | N          | Y          |
| 37           | 67  | M   | 7                 | 6   | 2         | Classical                        | 14.3       | 0.2      | 29         | 85         | 139         | CR               | CR      | Y          | Y          |
| 38           | 56  | M   | 3                 | 1   | 1         | Classical                        | 13.3       | 0.9      | 79         | 65         | 177         | SD               | CR      |            |            |
| 39           | 72  | M   | 4                 | 3   | 1         | Classical                        | 7.2        | 0.8      | 92         | 99         | 156         | PR               | PR      |            |            |
| 40           | 60  | M   | 4                 | 2   | 0         | Classical                        | 14.2       | 1.5      | 51         | 90         | 172         | CR               | PR      | N          | N          |
| 41           | 82  | M   | 7                 | 3   | 2         | Classical                        | 7.7        | 2.2      | 23         | 100        | splenectomy | SD               | CR      |            |            |
| 42           | 57  | M   | 9                 | 4   | 5         | Classical                        | 7.4        | 0.3      | 19         | 100        | splenectomy | PR               | PR      |            |            |
| 43           | 53  | F   | 4                 | 2   | 0         | Classical                        | 9.0        | 0.2      | 57         | 80         | 135         | CR               | CR      | Y          | Y          |
| 44           | 70  | M   | 3                 | 3   | 0         | Classical                        | 10.9       | 0.7      | 52         | 85         | 180         | NE               | NE      |            |            |
| 45           | 46  | M   | 3                 | 1   | 1         | Classical                        | 15.1       | 1.4      | 55         | 60         | 155         | CR               | CR      | Y          | Y          |
| 46           | 72  | M   | 5                 | 3   | 2         | Classical                        | 11.6       | 0.8      | 50         | 90         | 144         | PR               | PR      |            |            |
| 47           | 52  | M   | 3                 | 3   | 0         | Classical                        | 12.8       | 1.3      | 106        | 70         | 121         | PR               | CR      |            |            |
| 48           | 76  | M   | 3                 | 2   | 1         | Classical                        | 11.3       | 1.1      | 63         | 80         | 133         | CR               | CR      | Y          | Y          |
| 49           | 73  | M   | 5                 | 3   | 1         | Classical                        | 9.7        | 0.7      | 46         | 99         | 147         | PR               | PR      |            |            |
| 50           | 80  | M   | 4                 | 4   | 1         | Classical                        | 9.4        | 0.8      | 29         | NE         | 89          | PR               | CR      |            |            |
| 51           | 59  | F   | 4                 | 2   | 1         | Classical                        | 9.0        | 0.4      | 50         | 90         | 159         | PR               | PR      |            |            |
| 52           | 73  | F   | 3                 | 2   | 1         | Classical                        | 10.6       | 0.8      | 72         | 85         | 105         | CR               | PR      |            | Y          |
| 53           | 84  | F   | 3                 | 1   | 1         | Classical                        | 12.3       | 1.5      | 60         | 90         | 96          | CR               | CR      | N          | Y          |
| 54           | 41  | M   | 4                 | 3   | 1         | Classical                        | 14.7       | 1.4      | 75         | 20         | 147         | PR               | CR      |            |            |
| 55           | 44  | M   | 2                 | 2   | 1         | Classical                        | 13.8       | 0.5      | 99         | 96         | 101         | CR               | CR      | Y          | N          |
| 56           | 68  | M   | 3                 | 2   | 1         | Classical                        | 12.1       | 0.6      | 55         | 98         | 125         | PR               | CR      |            |            |

| Demographics |     |     | Prior Lines — No. |     |           | Baseline Disease Characteristics |            |          |            |            |             | Disease Response |         |            |            |
|--------------|-----|-----|-------------------|-----|-----------|----------------------------------|------------|----------|------------|------------|-------------|------------------|---------|------------|------------|
| Pt.          | Age | Sex | Total             | PNA | Rituximab | HCL Type                         | Hgb (g/dL) | ANC (nL) | Plat. (nL) | BM H&E (%) | Spleen (mm) | BICR BOR         | INV BOR | Durable CR | CR Ongoing |
| 57           | 45  | M   | 2                 | 1   | 1         | Classical                        | 16.0       | 0.7      | 138        | 90         | 136         | CR               | CR      | Y          | Y          |
| 58           | 62  | F   | 2                 | 1   | 1         | Variant                          | 11.4       | 6.2      | 71         | 40         | 207         | SD               | PR      |            |            |
| 59           | 58  | M   | 2                 | 2   | 0         | Classical                        | 12.7       | 0.6      | 67         | 0          | 133         | SD               | CR      |            |            |
| 60           | 77  | F   | 6                 | 6   | 2         | Classical                        | 10.7       | 2.0      | 350        | 8          | splenectomy | PR               | SD      |            |            |
| 61           | 48  | M   | 2                 | 2   | 1         | Classical                        | 10.8       | 1.0      | 96         | 99         | 133         | PR               | PR      |            |            |
| 62           | 51  | M   | 9                 | 5   | 1         | Classical                        | 7.4        | 1.3      | 17         | 100        | splenectomy | NE               | SD      |            |            |
| 63           | 66  | F   | 4                 | 4   | 0         | Classical                        | 9.3        | 0.7      | 6          | 100        | splenectomy | SD               | SD      |            |            |
| 64           | 79  | F   | 8                 | 5   | 1         | Classical                        | 12.8       | 4.2      | 81         | 75         | 141         | NE               | NE      |            |            |
| 65           | 82  | M   | 5                 | 5   | 2         | Classical                        | 9.6        | 0.9      | 41         | 100        | 99          | CR               | CR      | N          | Y          |
| 66           | 47  | M   | 5                 | 2   | 0         | Classical                        | 9.7        | 0.9      | 43         | 100        | 115         | NE               | SD      |            |            |
| 67           | 70  | M   | 9                 | 4   | 3         | Classical                        | 11.5       | 0.4      | 54         | 70         | 105         | CR               | CR      | N          | Y          |
| 68           | 64  | M   | 7                 | 4   | 2         | Classical                        | 9.4        | 0.2      | 41         | 70         | 128         | PD               | SD      |            |            |
| 69           | 68  | M   | 7                 | 4   | 2         | Classical                        | 9.6        | 1.1      | 72         | 100        | 102         | PR               | PR      |            |            |
| 70           | 50  | M   | 3                 | 2   | 1         | Classical                        | 16.3       | 1.1      | 87         | NE         | 125         | CR               | CR      | Y          | Y          |
| 71           | 58  | F   | 3                 | 3   | 0         | Classical                        | 13.4       | 0.9      | 131        | 40         | 104         | PR               | CR      |            |            |
| 72           | 71  | M   | 8                 | 4   | 1         | Classical                        | 8.0        | 0.9      | 36         | 100        | 170         | PR               | CR      |            |            |
| 73           | 73  | M   | 5                 | 3   | 2         | Classical                        | 6.5        | 0.3      | 12         | 100        | 247         | NE               | NE      |            |            |
| 74           | 54  | M   | 3                 | 3   | 1         | Classical                        | 8.3        | 0.8      | 54         | 95         | 124         | PD               | SD      |            |            |
| 75           | 57  | M   | 2                 | 1   | 1         | Classical                        | 11.1       | 0.4      | 80         | 95         | 157         | SD               | PD      |            |            |
| 76           | 64  | M   | 2                 | 1   | 2         | Variant                          | 8.0        | 3.7      | 90         | 85         | 205         | PR               | SD      |            |            |
| 77           | 69  | M   | 11                | 7   | 2         | Classical                        | 8.8        | 0.3      | 31         | NE         | 136         | SD               | PR      |            |            |
| 78           | 71  | M   | 2                 | 2   | 2         | Variant                          | 12.9       | 2.9      | 68         | 0          | 182         | SD               | SD      |            |            |
| 79           | 62  | M   | 7                 | 4   | 1         | Classical                        | 11.1       | 0.4      | 54         | 100        | 132         | PR               | PR      |            |            |
| 80           | 66  | M   | 2                 | 2   | 0         | Classical                        | 12.6       | 0.8      | 70         | 50         | 198         | PR               | PR      |            |            |

**Table S2. Summary of Changes in Laboratory Values**

| <b>Parameter</b>  | <b>Baseline<br/>Median (Minimum,<br/>Maximum)</b> | <b>Worst on Treatment<br/>Median (Minimum,<br/>Maximum)</b> | <b>End of Treatment<br/>Median (Minimum,<br/>Maximum)</b> |
|-------------------|---------------------------------------------------|-------------------------------------------------------------|-----------------------------------------------------------|
| Hemoglobin, g/dL  | 11.10 (6.5, 16.3)                                 | 10.10 (6.4, 14.2)                                           | 13.14 (7.2, 16.5)                                         |
| Neutrophils, nL   | 0.81 (0.1, 6.2)                                   | 0.55 (0.0, 3.2)                                             | 2.75 (0.1, 7.0)                                           |
| Platelets, nL     | 68 (6, 350)                                       | 63 (5, 263)                                                 | 162 (7, 439)                                              |
| CD4+ T cells, nL  | 350 (36, 1 500)                                   | 222 (21, 683)                                               | 390 (57, 2 370)                                           |
| IgA, mg/dL        | 106.5 (11, 260)                                   | 95.0 (9, 250)                                               | 105.0 (6,339)                                             |
| IgG, mg/dL        | 834.0 (387, 3 003)                                | 801.0 (237, 2 664)                                          | 855.0 (237, 3 075)                                        |
| IgM — mg/dL       | 42.0 (6, 327)                                     | 35.0 (5, 237)                                               | 49.0 (5, 312)                                             |
| Creatinine, mg/dL | 0.85 (0.4, 1.3)                                   | 1.11 (0.6, 5.6)                                             | 0.96 (0.5, 4.3)                                           |

**Table S3. Pharmacokinetic Parameters**

| <b>Parameter (units)</b> | <b>Cycle 1, Day 1</b>      | <b>Cycle 1, Day 5</b>   | <b>Cycle 2, Day 1</b>      |
|--------------------------|----------------------------|-------------------------|----------------------------|
| $T_{max}$ , h            | 0.567 (0.433–1.30)<br>[75] | 0.550 (0.417–2.45) [71] | 0.583 (0.500–1.75)<br>[69] |
| $C_{max}$ , ng/mL        | 192 (162) [75]             | 435 (233) [71]          | 379 (262) [69]             |
| $AUC_{0-last}$ , ng.h/mL | 120 (261) [75]             | 820 (721) [71]          | 626 (610) [69]             |
| $AUC_{0-inf}$ , ng.h/mL  | NR*                        | 1300 (742) [49]         | 1470 (541) [22]            |
| CL, mL/h/kg              | NR*                        | 44.6 (30.5) [49]        | 31.8 (13.7) [22]           |
| $t_{1/2}$ , h            | NR*                        | 1.38 (0.632) [49]       | 1.39 (0.351) [22]          |

\*Not reported owing to lack of measurable concentration in the terminal phase.

Note: Values presented as mean (standard deviation) [N], except for  $T_{max}$ , which is shown as median and range (minimum–maximum). All pharmacokinetic parameters are rounded to 3 significant figures.



**Figure S1. Patient Disposition**

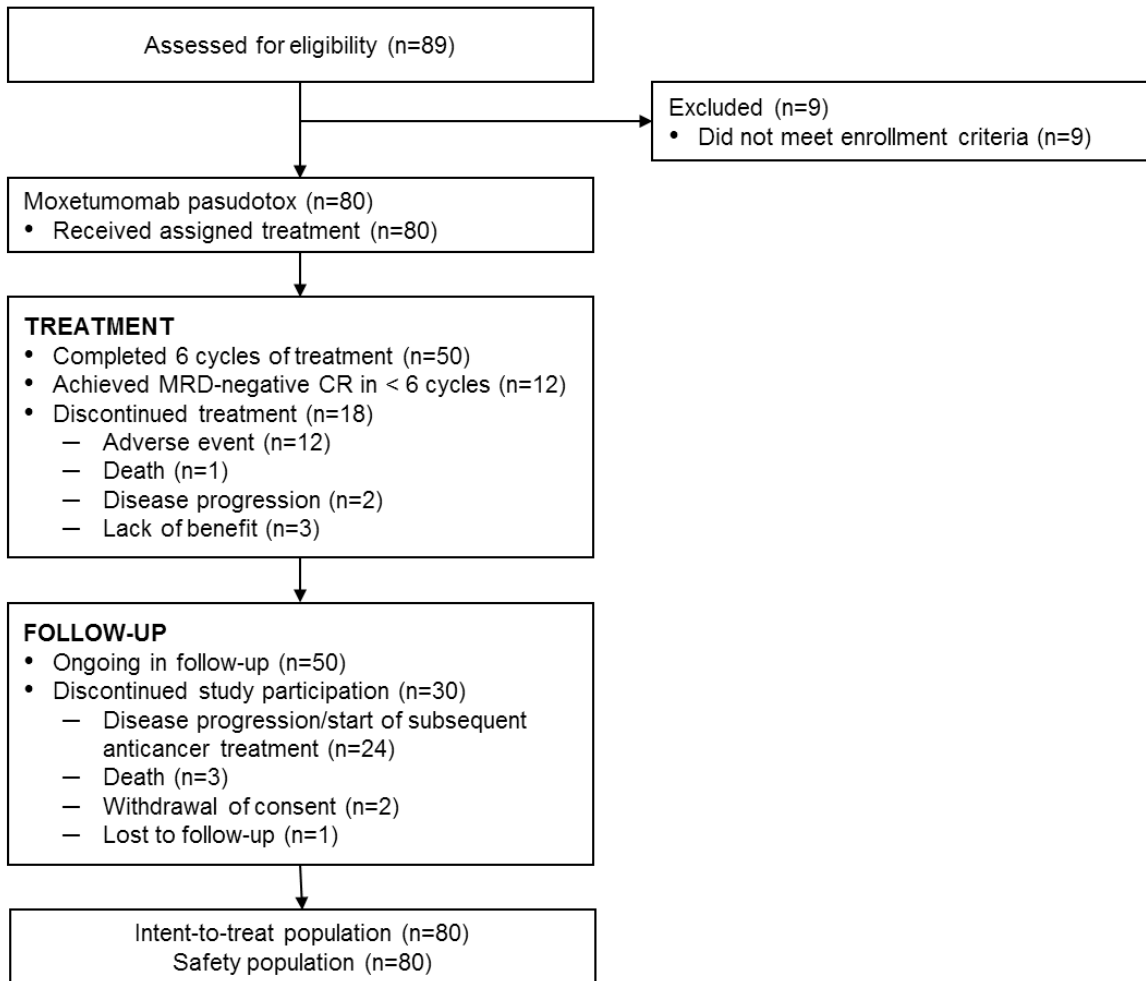

**Figure S2.** Forest plot of complete response by subgroup.

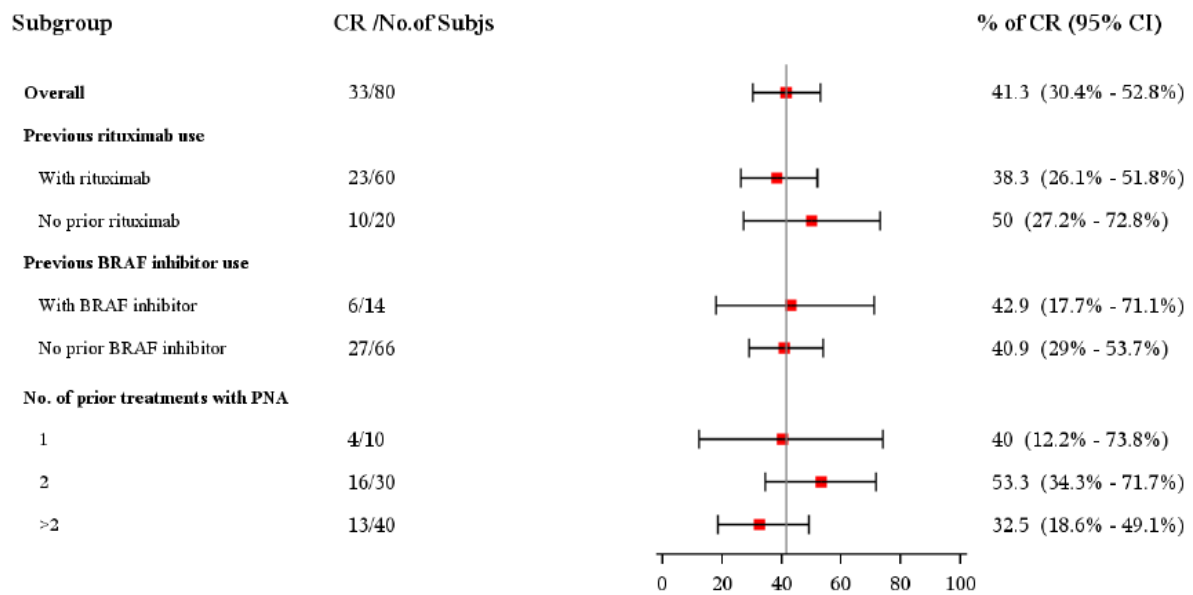

**Figure S3. Pharmacokinetics, immunogenicity, and pharmacodynamics.** A. Mean concentration-time profiles following administration in the first two cycles of treatment. Error bars represent standard deviation of the mean. Data below the lower limit of quantification (40 ng/mL; as shown by dotted horizontal line) are plotted at 20 ng/mL for illustrative purposes only. B. Correlation between baseline B cell counts and moxetumomab pasudotox exposure following the first dose. Symbols are individual observations; solid line represents line of fit; shaded area represents the 95% confidence interval for the mean line of fit;  $\ln$ =natural logarithm. C. Percent of patients with neutralizing antibodies and anti-drug antibody titer as a function of time and best objective response. Median and interquartile range are shown. Drug exposure was found to be reduced when anti-drug antibody titer was high (>10 000); this threshold is noted with a dashed line. D. Effect of anti-drug antibody titer on moxetumomab pasudotox exposure. Symbols are individual observations; solid line represents the LOESS smoothed fit; shaded area represents the 95% confidence interval for the line of fit. E. CD19+ B cell count as a function of time and best objective response. Median and interquartile range are shown. Note that one patient (best objective response of partial response, achieved 6 months post end of treatment) with very high B cell counts (>50 000 cells/ $\mu$ L) throughout treatment was excluded from this figure.

**A.**

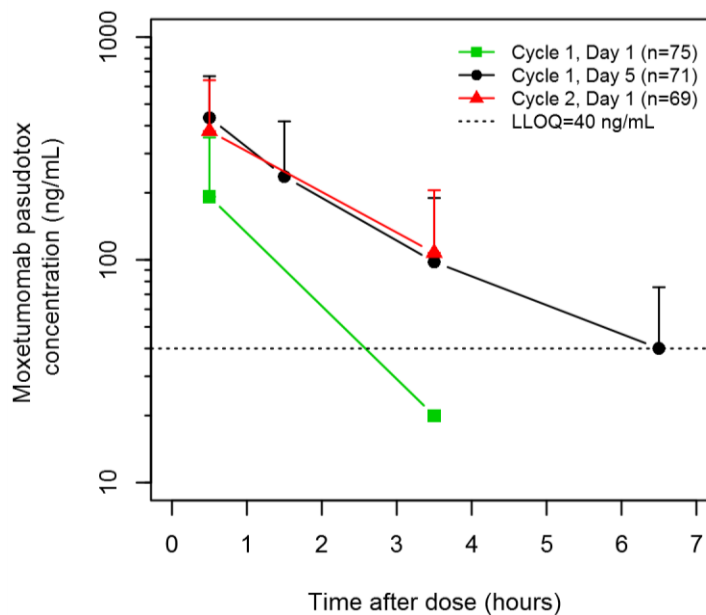

**B**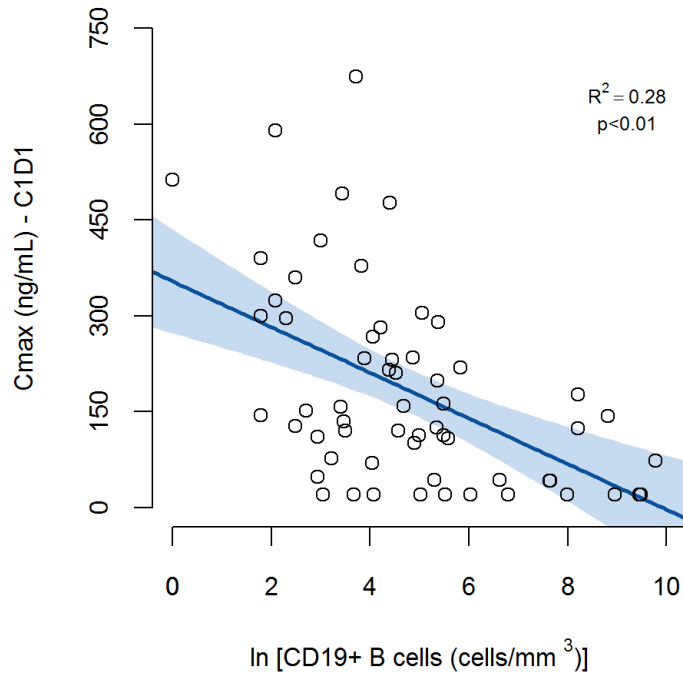**C**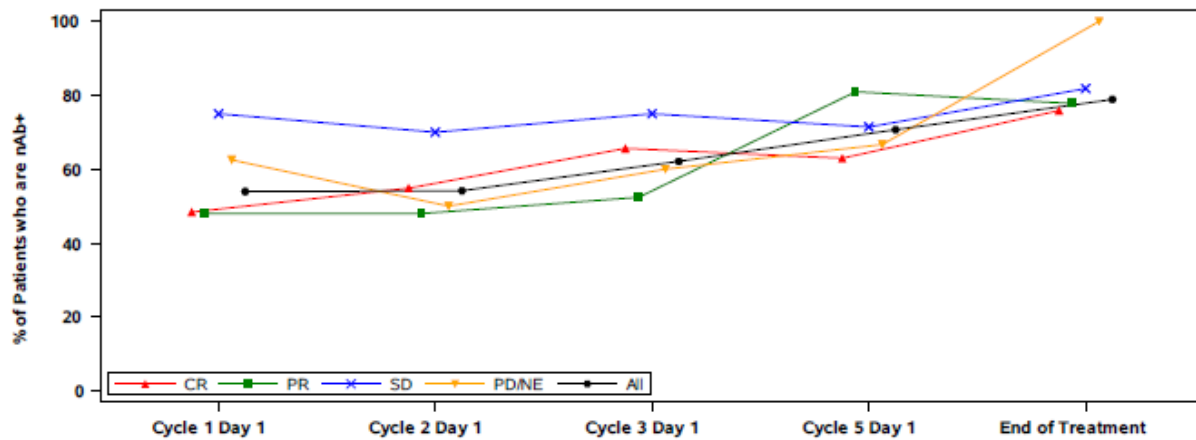

|       |        |        |        |        |        |
|-------|--------|--------|--------|--------|--------|
| CR    | N = 31 | N = 31 | N = 32 | N = 27 | N = 29 |
| PR    | N = 25 | N = 25 | N = 21 | N = 21 | N = 27 |
| SD    | N = 12 | N = 10 | N = 8  | N = 7  | N = 11 |
| PD/NE | N = 8  | N = 6  | N = 5  | N = 3  | N = 4  |
| All   | N = 76 | N = 72 | N = 66 | N = 58 | N = 71 |

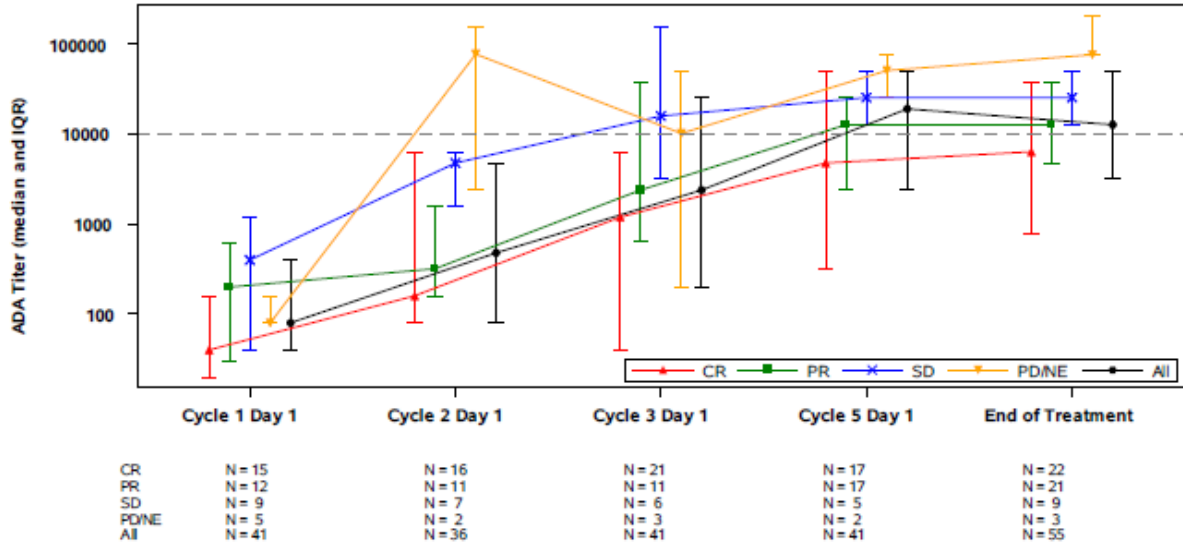

D.

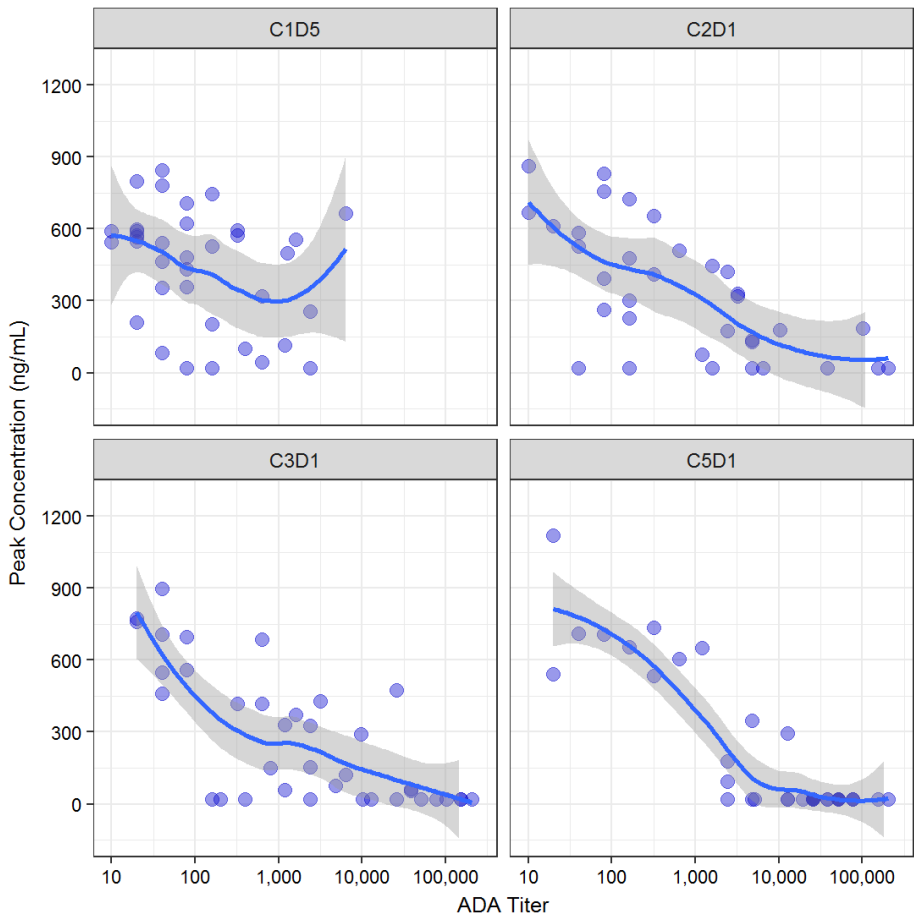

E.

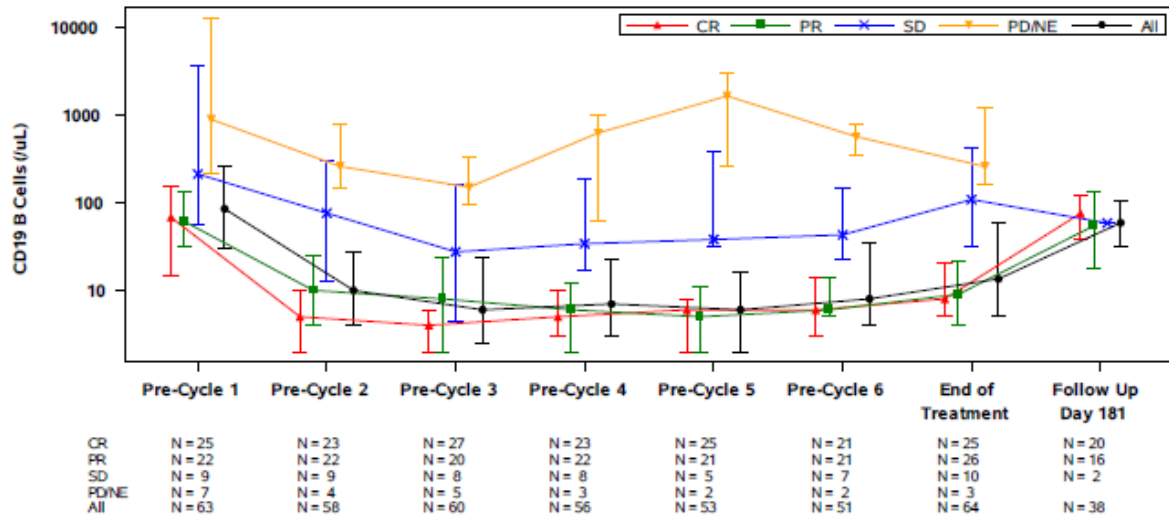

Supplement: MOESM1 [file 41375_2018_210_MOESM1_ESM.pdf]
